# Supplementary material for: Coagulation profile and platelet parameters in pregnancy induced hypertension cases and normotensive pregnancies: A cross-sectional study
Source: PubMed Central journal article supplement (PMC9422044; doi:10.1016/j.amsu.2022.104124), 2022-07-10
Supplement: mmc1.pdf [file mmc1.pdf]

## The STROCSS 2019 Guideline

| Item no.            | Item description                                                                                                                                                                                                                                                                                                                                                                                                                                                                                             | Page |
|---------------------|--------------------------------------------------------------------------------------------------------------------------------------------------------------------------------------------------------------------------------------------------------------------------------------------------------------------------------------------------------------------------------------------------------------------------------------------------------------------------------------------------------------|------|
| <b>TITLE</b>        |                                                                                                                                                                                                                                                                                                                                                                                                                                                                                                              |      |
| 1                   | <p>Title:</p> <ul style="list-style-type: none"> <li>- The word cohort or cross-sectional or case-controlled is included</li> <li>- The area of focus is described (e.g. disease, exposure/intervention, outcome)</li> <li>- Key elements of study design are stated (e.g. retrospective or prospective)</li> </ul>                                                                                                                                                                                          | 1    |
| <b>ABSTRACT</b>     |                                                                                                                                                                                                                                                                                                                                                                                                                                                                                                              |      |
| 2a                  | <p>Introduction: the following points are briefly described</p> <ul style="list-style-type: none"> <li>- Background</li> <li>- Scientific Rationale for this study</li> </ul>                                                                                                                                                                                                                                                                                                                                | 1    |
| 2b                  | <p>Methods: the following areas are briefly described</p> <ul style="list-style-type: none"> <li>- Study design (cohort, retro-/prospective, single/multi-centred)</li> <li>- Patient populations and/or groups, including control group, if applicable</li> <li>- Interventions (type, operators, recipients, timeframes)</li> <li>- Outcome measures</li> </ul>                                                                                                                                            | 1    |
| 2c                  | <p>Results: the following areas are briefly described</p> <ul style="list-style-type: none"> <li>- Summary data (with statistical relevance) with qualitative descriptions, where appropriate</li> </ul>                                                                                                                                                                                                                                                                                                     | 1    |
| 2d                  | <p>Conclusion: the following areas are briefly described</p> <ul style="list-style-type: none"> <li>- Key conclusions</li> <li>- Implications to practice</li> <li>- Direction of and need for future research</li> </ul>                                                                                                                                                                                                                                                                                    | 1    |
| <b>INTRODUCTION</b> |                                                                                                                                                                                                                                                                                                                                                                                                                                                                                                              |      |
| 3                   | <p>Introduction: the following areas are described in full</p> <ul style="list-style-type: none"> <li>- Relevant background and scientific rationale</li> <li>- Aims and objectives</li> <li>- Research question and hypotheses, where appropriate</li> </ul>                                                                                                                                                                                                                                                | 1-2  |
| <b>METHODS</b>      |                                                                                                                                                                                                                                                                                                                                                                                                                                                                                                              |      |
| 4a                  | <p>Registration and ethics</p> <ul style="list-style-type: none"> <li>- Research Registry number is stated, in accordance with the declaration of Helsinki*</li> <li>- All studies (including retrospective) should be registered before submission</li> </ul> <p><i>*"Every research study involving human subjects must be registered in a publicly accessible database before recruitment of the first subject" (this can be obtained from: ResearchRegistry.com or ClinicalTrials.gov or ISRCTN)</i></p> | 2-4  |
| 4b                  | <p>Ethical Approval: the following areas are described in full</p> <ul style="list-style-type: none"> <li>- Necessity for ethical approval</li> <li>- Ethical approval, with relevant judgement reference from ethics committees</li> <li>- Where ethics was unnecessary, reasons are provided</li> </ul>                                                                                                                                                                                                    | 2-4  |
| 4c                  | <p>Protocol: the following areas are described comprehensively</p> <ul style="list-style-type: none"> <li>- Protocol (<i>a priori</i> or otherwise) details, with access directions</li> <li>- If published, journal mentioned with the reference provided</li> </ul>                                                                                                                                                                                                                                        | 2-4  |

|                                        |                                                                                                                                                                                                                                                                                                                                                                                                                                                          |     |
|----------------------------------------|----------------------------------------------------------------------------------------------------------------------------------------------------------------------------------------------------------------------------------------------------------------------------------------------------------------------------------------------------------------------------------------------------------------------------------------------------------|-----|
| 4d                                     | <p>Patient Involvement in Research</p> <ul style="list-style-type: none"> <li>- Describe how, if at all, patients were involved in study design e.g. were they involved on the study steering committee, did they provide input on outcome selection, etc.</li> </ul>                                                                                                                                                                                    | 2-4 |
| 5a                                     | <p>Study Design: the following areas are described comprehensively</p> <ul style="list-style-type: none"> <li>- 'Cohort' study is mentioned</li> <li>- Design (e.g. retro-/prospective, single/multi-centred)</li> </ul>                                                                                                                                                                                                                                 | 2-4 |
| 5b                                     | <p>Setting: the following areas are described comprehensively</p> <ul style="list-style-type: none"> <li>- Geographical location</li> <li>- Nature of institution (e.g. academic/community, public/private)</li> <li>- Dates (recruitment, exposure, follow-up, data collection)</li> </ul>                                                                                                                                                              | 2-4 |
| 5c                                     | <p>Cohort Groups: the following areas are described in full</p> <ul style="list-style-type: none"> <li>- Number of groups</li> <li>- Division of intervention between groups</li> </ul>                                                                                                                                                                                                                                                                  | 2-4 |
| 5d                                     | <p>Subgroup Analysis: the following areas are described comprehensively</p> <ul style="list-style-type: none"> <li>- Planned subgroup analyses</li> <li>- Methods used to examine subgroups and their interactions</li> </ul>                                                                                                                                                                                                                            | 2-4 |
| 6a                                     | <p>Participants: the following areas are described comprehensively</p> <ul style="list-style-type: none"> <li>- Eligibility criteria</li> <li>- Recruitment sources</li> <li>- Length and methods of follow-up</li> </ul>                                                                                                                                                                                                                                | 2-4 |
| 6b                                     | <p>Recruitment: the following areas are described comprehensively</p> <ul style="list-style-type: none"> <li>- Methods of recruitment to each patient group</li> <li>- Period of recruitment</li> </ul>                                                                                                                                                                                                                                                  | 2-4 |
| 6c                                     | <p>Sample Size: the following areas are described comprehensively</p> <ul style="list-style-type: none"> <li>- Margin of error calculation</li> <li>- Analysis to determine study population</li> <li>- Power calculations, where appropriate</li> </ul>                                                                                                                                                                                                 | 2-4 |
| <b>INTERVENTION AND CONSIDERATIONS</b> |                                                                                                                                                                                                                                                                                                                                                                                                                                                          |     |
| 7a                                     | <p>Pre-intervention Considerations: the following areas are described comprehensively</p> <ul style="list-style-type: none"> <li>- Patient optimisation (pre-surgical measures)</li> <li>- Pre-intervention treatment (hypothermia/-volaemia/-tension; ICU care; bleeding problems; medications)</li> </ul>                                                                                                                                              | 2-4 |
| 7b                                     | <p>Intervention: the following areas are described comprehensively</p> <ul style="list-style-type: none"> <li>- Type of intervention and reasoning (e.g. pharmacological, surgical, physiotherapy, psychological)</li> <li>- Aim of intervention (preventative/therapeutic)</li> <li>- Concurrent treatments (antibiotics, analgaesia, anti-emetics, NBM, VTE prophylaxis)</li> <li>- Manufacturer and model details where applicable</li> </ul>         | 2-4 |
| 7c                                     | <p>Intra-Intervention Considerations: the following areas are described comprehensively</p> <ul style="list-style-type: none"> <li>- Administration of intervention (location, surgical details, anaesthetic, positioning, equipment needed, preparation, devices, sutures, operative time)</li> <li>- Pharmacological therapies include formulation, dosages, routes and durations</li> <li>- Figures and other media are used to illustrate</li> </ul> | 2-4 |

|                |                                                                                                                                                                                                                                                                                                                                                              |     |
|----------------|--------------------------------------------------------------------------------------------------------------------------------------------------------------------------------------------------------------------------------------------------------------------------------------------------------------------------------------------------------------|-----|
| 7d             | Operator Details: the following areas are described comprehensively <ul style="list-style-type: none"> <li>- Training needed</li> <li>- Learning curve for technique</li> <li>- Specialisation and relevant training</li> </ul>                                                                                                                              | 2-4 |
| 7e             | Quality Control: the following areas are described comprehensively <ul style="list-style-type: none"> <li>- Measures taken to reduce variation</li> <li>- Measures taken to ensure quality and consistency in intervention delivery</li> </ul>                                                                                                               | 2-4 |
| 7f             | Post-Intervention Considerations: the following areas are described comprehensively <ul style="list-style-type: none"> <li>- Post-operative instructions and care</li> <li>- Follow-up measures</li> <li>- Future surveillance requirements (e.g. imaging, blood tests)</li> </ul>                                                                           | 2-4 |
| 8              | Outcomes: the following areas are described comprehensively <ul style="list-style-type: none"> <li>- Primary outcomes, including validation, where applicable</li> <li>- Definitions of outcomes</li> <li>- Secondary outcomes, where appropriate</li> <li>- Follow-up period for outcome assessment, divided by group</li> </ul>                            | 2-4 |
| 9              | Statistics: the following areas are described comprehensively <ul style="list-style-type: none"> <li>- Statistical tests, packages/software used, and interpretation of significance</li> <li>- Confounders and their control, if known</li> <li>- Analysis approach (e.g. intention to treat/per protocol)</li> <li>- Sub-group analysis, if any</li> </ul> | 2-4 |
| <b>RESULTS</b> |                                                                                                                                                                                                                                                                                                                                                              |     |
| 10a            | Participants: the following areas are described comprehensively <ul style="list-style-type: none"> <li>- Flow of participants (recruitment, non-participation, cross-over and withdrawal, with reasons)</li> <li>- Population demographics (prognostic features, relevant socioeconomic features, and significant numerical differences)</li> </ul>          | 3-5 |
| 10b            | Participant Comparison: the following areas are described comprehensively <ul style="list-style-type: none"> <li>- Table comparing demographics included</li> <li>- Differences, with statistical relevance</li> <li>- Any group matching, with methods</li> </ul>                                                                                           | 3-5 |
| 10c            | Intervention: the following areas are described comprehensively <ul style="list-style-type: none"> <li>- Changes to interventions, with rationale and diagram, if appropriate</li> <li>- Learning required for interventions</li> <li>- Degree of novelty for intervention</li> </ul>                                                                        | 3-5 |
| 11a            | Outcomes: the following areas are described comprehensively <ul style="list-style-type: none"> <li>- Clinician-assessed and patient-reported outcomes for each group</li> <li>- Relevant photographs and imaging are desirable</li> <li>- Confounders to outcomes and which are adjusted</li> </ul>                                                          | 3-5 |
| 11b            | Tolerance: the following areas are described comprehensively <ul style="list-style-type: none"> <li>- Assessment of tolerance</li> <li>- Loss to follow up, with reasons (percentage and fraction)</li> <li>- Cross-over with explanation</li> </ul>                                                                                                         | 3-5 |
| 11c            | Complications: the following areas are described comprehensively <ul style="list-style-type: none"> <li>- Adverse events described</li> <li>- Classified according to Clavien-Dindo classification*</li> </ul>                                                                                                                                               | 3-5 |

|                     |                                                                                                                                                                                                                                                                                                                                                             |      |
|---------------------|-------------------------------------------------------------------------------------------------------------------------------------------------------------------------------------------------------------------------------------------------------------------------------------------------------------------------------------------------------------|------|
|                     | <ul style="list-style-type: none"> <li>- Mitigation for adverse events (blood loss, wound care, revision surgery should be specified)</li> </ul> <p>*Dindo D, Demartines N, Clavien P-A. Classification of Surgical Complications. A New Proposal with Evaluation in a Cohort of 6336 Patients and Results of a Survey. Ann Surg. 2004; 240(2): 205-213</p> |      |
| 12                  | <p>Key Results: the following areas are described comprehensively</p> <ul style="list-style-type: none"> <li>- Key results, including relevant raw data</li> <li>- Statistical analyses with significance</li> </ul>                                                                                                                                        | 3-5  |
| <b>DISCUSSION</b>   |                                                                                                                                                                                                                                                                                                                                                             |      |
| 13                  | <p>Discussion: the following areas are described comprehensively</p> <ul style="list-style-type: none"> <li>- Conclusions and rationale</li> <li>- Reference to relevant literature</li> <li>- Implications to clinical practice</li> <li>- Comparison to current gold standard of care</li> <li>- Relevant hypothesis generation</li> </ul>                | 5-13 |
| 14                  | <p>Strengths and Limitations: the following areas are described comprehensively</p> <ul style="list-style-type: none"> <li>- Strengths of the study</li> <li>- Limitations and potential impact on results</li> <li>- Assessment of bias and management</li> </ul>                                                                                          | 5-13 |
| 15                  | <p>Implications and Relevance: the following areas are described comprehensively</p> <ul style="list-style-type: none"> <li>- Relevance of findings and potential implications to clinical practice are detailed</li> <li>- Future research that is needed is described, with study designs detailed</li> </ul>                                             | 5-13 |
| <b>CONCLUSION</b>   |                                                                                                                                                                                                                                                                                                                                                             |      |
| 16                  | <p>Conclusions:</p> <ul style="list-style-type: none"> <li>- Key conclusions are summarised</li> <li>- Key directions for future research are summarised</li> </ul>                                                                                                                                                                                         | 14   |
| <b>DECLARATIONS</b> |                                                                                                                                                                                                                                                                                                                                                             |      |
| 17a                 | <p>Conflicts of interest</p> <ul style="list-style-type: none"> <li>- Conflicts of interest, if any, are described</li> </ul>                                                                                                                                                                                                                               | 14   |
| 17b                 | <p>Funding</p> <ul style="list-style-type: none"> <li>- Sources of funding (e.g. grant details), if any, are clearly stated</li> </ul>                                                                                                                                                                                                                      | 14   |
